# Supplementary material for: Electroless Cobalt Deposition on Dealloyed Nanoporous Gold Substrate: A Versatile Technique to Control Morphological and Magnetic Properties
Source: MDPI journal article supplement (doi:10.3390/nano13030494), 2023-01-26
Supplement: s1 [file s1]

# Electroless Cobalt deposition on dealloyed nanoporous Gold substrate: a versatile technique to control morphological and magnetic properties

Gabriele Barrera<sup>1\*</sup>, Federico Scaglione<sup>2\*</sup>, Federica Celegato<sup>1</sup>, Marco Coisson<sup>1</sup>, Paola Tiberto<sup>1</sup> and Paola Rizzi<sup>2</sup>

<sup>1</sup>Istituto Nazionale di Ricerca Metrologica (INRIM), Str. delle Cacce, 91, 10135 Torino, Italy

<sup>2</sup>Dipartimento di Chimica e Centro Interdipartimentale NIS (Nanostructured Surfaces and Interfaces), Università di Torino, Via Pietro Giuria 7, 10125 Torino, Italy

\* Correspondence: g.barrera@inrim.it; federico.scaglione@unito.it.

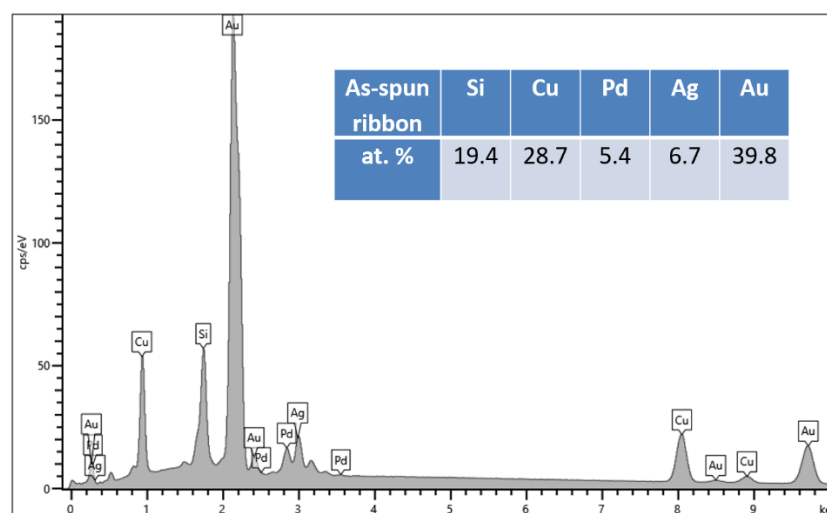

**Figure S1.** EDS spectrum and table with the composition in at.% of the as-spun ribbon. Compositional result is in good agreement with the nominal one.

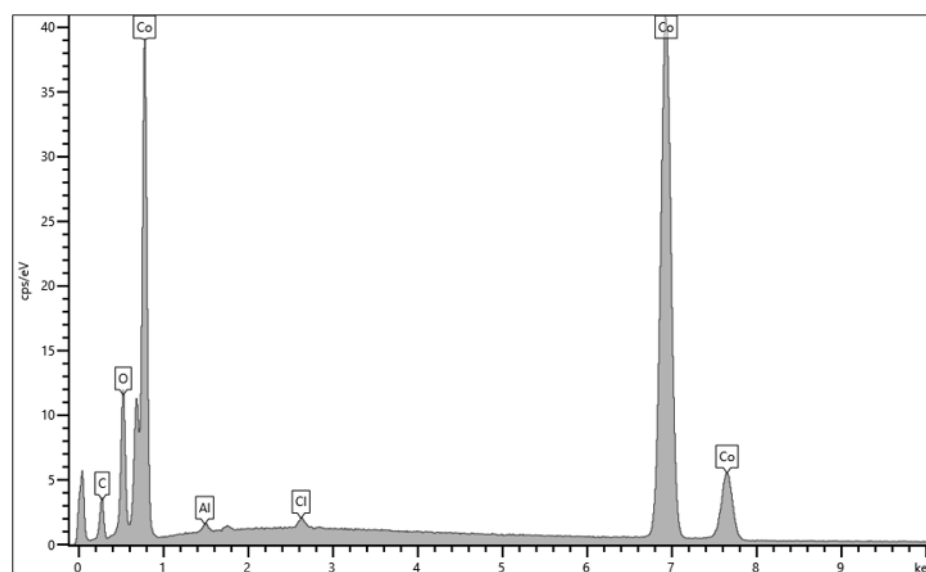

**Figure S2.** EDS spectrum of the Co-NPG\_195 sample.

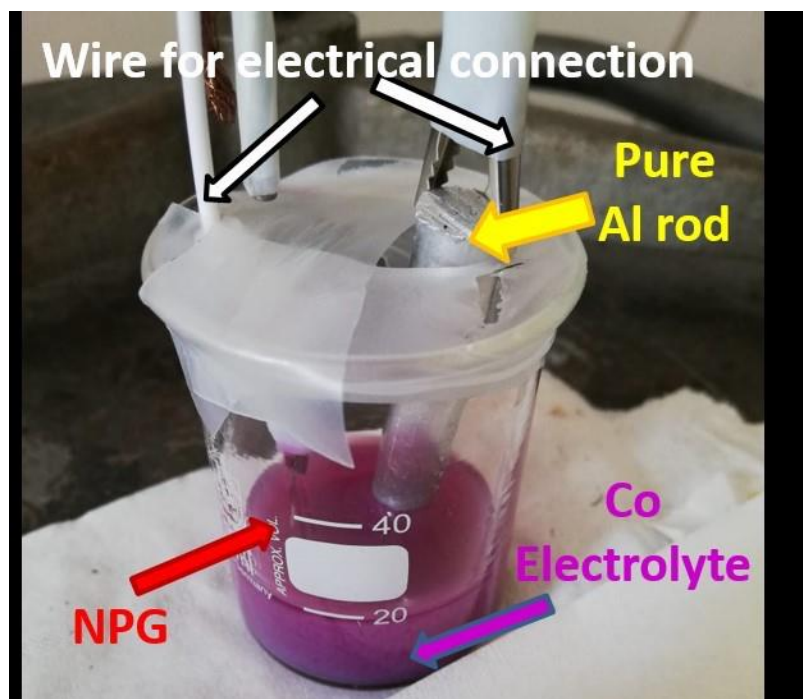

**Figure S3.** experimental setup for electroless Co deposition on NPG substrate.

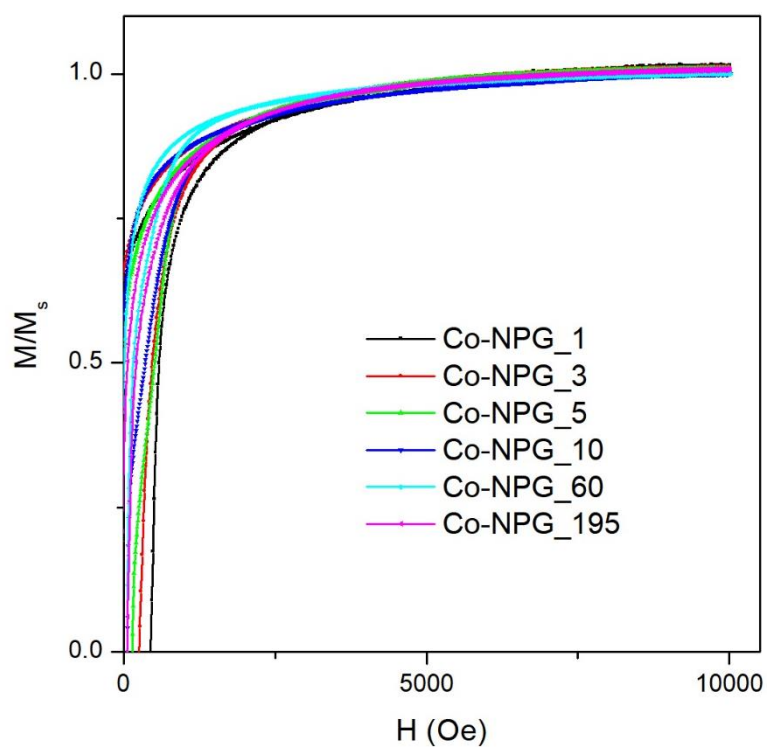

**Figure S4.** High-field magnification of the room temperature hysteresis loops for all hybrid Co/NPG heterostructures.
